# Supplementary material
Source: ML conference proceedings conference paper supplement (https://proceedings.mlr.press/v32/kontorovichb14.html)
Supplement: Supplementary file 1 [file kontorovichb14-supp.zip › camera-app.pdf]

## A. Bayes near-optimality proof

*Proof of Theorem 1.* Since  $\eta$  is  $L$ -Lipschitz, given  $x, x' \in \mathcal{X}$  we have

$$\begin{aligned} P(Y \neq Y' | x, x') &= \sum_{j \in \mathcal{Y}} \eta_j(x)(1 - \eta_j(x')) \\ &\leq \sum_j \eta_j(x) (1 - \eta_j(x) + Ld(x, x')) \\ &= \sum_j \eta_j(x) (1 - \eta_j(x)) + Ld(x, x'). \end{aligned} \quad (18)$$

By the definition of the nearest neighbor classifier  $g_{\text{NN}}$  in (6) we have  $\mathbb{E}_S[P(g_{\text{NN}}(X) \neq Y)] = \mathbb{E}_S[P(Y_{\pi_1(X)} \neq Y)]$ , where the expectation is over the sample  $S$  determining  $g_{\text{NN}}$ . By (18) this error is bounded above by

$$\mathbb{E}_{S,X}[\sum_j \eta_j(X)(1 - \eta_j(X))] + L\mathbb{E}_{S,X}[d(X, X_{\pi_1(X)})],$$

where now the expectation is over  $S$  and  $X$ . Denoting  $k' = \arg\max_j \eta_j(X)$  and splitting the sum, the first term (which does not depend on  $S$ ) satisfies

$$\begin{aligned} \mathbb{E}_X[\eta_{k'}(X)(1 - \eta_{k'}(X))] + \mathbb{E}_X[\sum_{j \neq k'} \eta_j(X)(1 - \eta_j(X))] \\ \leq \mathbb{E}_X[1 - \eta_{k'}(X)] + \mathbb{E}_X[\sum_{j \neq k'} \eta_j(X)] \\ = 2\mathbb{E}_X[1 - \eta_{k'}(X)] = 2P(g^*(X) \neq Y). \end{aligned}$$

It remains to bound  $\mathbb{E}_{S,X}[d(X, X_{\pi_1(X)})]$  and we proceed exactly as in Ben-David & Shalev-Shwartz (2014). Let  $\{C_1, \dots, C_N\}$  be an  $\varepsilon$ -cover of  $\mathcal{X}$  of cardinality  $N = \mathcal{N}(\varepsilon, \mathcal{X}, d)$ . Given a sample  $S$ , for  $x \in C_i$  such that  $S \cap C_i \neq \emptyset$  we have  $d(x, X_{\pi_1(x)}) < \varepsilon$ , while for  $x \in C_i$  such that  $S \cap C_i = \emptyset$  we have  $d(x, X_{\pi_1(x)}) \leq \text{diam}(\mathcal{X}) = 1$ , thus  $\mathbb{E}_{S,X}[d(X, X_{\pi_1(X)})]$  is bounded above by

$$\begin{aligned} &\leq \mathbb{E}_S \left[ \sum_{i=1}^N P(C_i) (\varepsilon \mathbb{1}_{\{S \cap C_i \neq \emptyset\}} + \mathbb{1}_{\{S \cap C_i = \emptyset\}}) \right] \\ &= \sum_{i=1}^N P(C_i) (\varepsilon \mathbb{E}_S [\mathbb{1}_{\{S \cap C_i \neq \emptyset\}}] + \mathbb{E}_S [\mathbb{1}_{\{S \cap C_i = \emptyset\}}]). \end{aligned}$$

Since  $P(C_i)\mathbb{E}_S[\mathbb{1}_{\{S \cap C_i = \emptyset\}}] = P(C_i)(1 - P(C_i))^n \leq 1/en$  and  $N = \mathcal{N}(\varepsilon, \mathcal{X}, d)$  we get

$$\begin{aligned} \mathbb{E}_{S,X}[d(X, X_{\pi_1(X)})] &\leq \varepsilon + \frac{\mathcal{N}(\varepsilon, \mathcal{X}, d)}{en} \\ &\leq \varepsilon + \frac{1}{en} \left( \frac{2}{\varepsilon} \right)^D. \end{aligned}$$

Setting  $\varepsilon = 2n^{-\frac{1}{D+1}}$  concludes the proof.  $\square$

## B. Rademacher analysis proofs

*Proof of inequality (10).* Dudley's chaining integral (Dudley, 1967) bounds from above the Rademacher complexity  $\mathcal{R}_n(\mathcal{H}_L)$  by

$$\inf_{\alpha > 0} \left( 4\alpha + 12 \int_{\alpha}^{\infty} \sqrt{\frac{\log \mathcal{N}(t, \mathcal{H}_L, \|\cdot\|_{\infty})}{n}} dt \right).$$

By Lemma 2 the integral can be bounded as follows:

$$\begin{aligned} &\int_{\alpha}^{\infty} \sqrt{\frac{\log \mathcal{N}(t, \mathcal{H}_L, \|\cdot\|_{\infty})}{n}} dt \\ &\leq \int_{\alpha}^{\infty} \sqrt{\frac{1}{n} \left( \frac{16L}{t} \right)^D \log \left( \frac{5k}{t} \right)} dt \\ &\leq \int_{\alpha}^{\infty} \sqrt{\frac{\log 5k}{n} \left( \frac{16L}{t} \right)^D \left( \frac{1}{t} \right)} dt \\ &= \sqrt{\frac{\log 5k}{n}} (16L)^{D/2} \int_{\alpha}^{\infty} \left( \frac{1}{t} \right)^{(D+1)/2} dt \\ &= \sqrt{\frac{\log 5k}{n}} (16L)^{D/2} \left( \frac{2}{D-1} \right) \left( \frac{1}{\alpha^{(D-1)/2}} \right), \end{aligned}$$

where in the second inequality we used the fact that for  $x \in (0, 1]$  and  $c \geq e$  we have  $\log(\frac{c}{x}) \leq \frac{\log c}{x}$ . Choosing

$$\alpha^* = \left( 9(16L)^D \frac{\log 5k}{n} \right)^{1/(D+1)}$$

yields the bound with

$$c_D = 16^{\frac{D}{D+1}} 36^{\frac{1}{D+1}} + \frac{24}{(D-1)3^{\frac{D-1}{D+1}}}.$$

$\square$

*Proof of Theorem 4.* An adaptation<sup>4</sup> of Mohri et al. (2012, Theorem 4.5) to  $\mathcal{H}_L$  states that with probability  $1 - \delta$ , for all  $L > 0, h \in \mathcal{H}_L$ ,

$$\begin{aligned} \mathbb{E}[\mathcal{L}_{\text{margin}}(h)] &\leq \widehat{\mathbb{E}}[\mathcal{L}_{\text{margin}}(h)] + 4\mathcal{R}_n(\mathcal{H}_L) \\ &\quad + \sqrt{\left( \frac{\log \log_2 2L}{n} \right)_+} + \sqrt{\frac{\log \frac{2}{\delta}}{2n}}. \end{aligned}$$

Since  $\mathbb{1}_{\{u < 0\}} \leq \mathcal{L}_{\text{margin}}(u)$  we have  $P(g_h(X) \neq Y) \leq \mathbb{E}[\mathcal{L}_{\text{margin}}(h)]$ . Since  $\mathcal{L}_{\text{margin}}(u) \leq \mathcal{L}_{\text{cutoff}}(u)$  we can replace  $\mathcal{L}_{\text{margin}}$  in the empirical loss by the loss function  $\mathcal{L}_{\text{cutoff}}$ . Bounding  $\mathcal{R}_n(\mathcal{H}_L)$  using (10) concludes the proof.  $\square$

<sup>4</sup>essentially setting  $\alpha = 1$  in Mohri et al. (2012) and doing the stratification on  $L$  instead

### C. Scale sensitive analysis proof

*Proof of Theorem 5.* An application<sup>5</sup> of [Guermeur \(2010, Theorem 1\)](#) states that with probability  $1 - \delta$ , for all  $L > 0$ ,  $h \in \mathcal{H}_L$ ,

$$P(g_h(X) \neq Y) \leq \frac{1}{n} \sum_{i=1}^n \mathbb{1}_{\{h(X_i, Y_i) < 1\}} + \sqrt{\frac{2}{n} \left( 2 \log \mathcal{N}(1/4, \mathcal{H}_L, \|\cdot\|_\infty) + \ln \left( \frac{2L}{\delta} \right) \right)} + \frac{1}{n}.$$

Applying the metric entropy bound in [Lemma 2](#) proves the Theorem.  $\square$

### D. Approximate NN proofs

First, we will show that  $\tilde{h}$  is indeed a  $2\eta$  additive perturbation of  $h$ , i.e.

$$\|h - \tilde{h}\|_\infty \leq 2\eta. \quad (19)$$

Instead of working directly with (16) we consider the following  $L$ -Lipschitz extension

$$\begin{aligned} h(x, y) &= \frac{1}{2} T_{[-1,1]} \left( \min_{S_1} \{ \xi(Y_i, y) + Ld(X_i, x) \} \right) \\ &+ \frac{1}{2} T_{[-1,1]} \left( \max_{S_1} \{ \xi(Y_i, y) - Ld(X_i, x) \} \right), \end{aligned}$$

easily seen to induce the same classifier  $g_h$  as (16). Consider the first term (the second term is treated similarly) and its approximate version:

$$\tilde{h}(x, y) = T_{[-1,1]} \left( \min_{S_1} \{ \xi(Y_i, y) + L\tilde{d}(X_i, x) \} \right),$$

where  $d \leq \tilde{d} \leq (1 + \eta)d$ , given in (15), is the approximate “distance” as provided by the approximate nearest neighbor. For notational convenience, denote

$$\begin{aligned} h(x, y) &= T_{[-1,1]}(\min_i q_i(x, y)) \\ \tilde{h}(x, y) &= T_{[-1,1]}(\min_i \tilde{q}_i(x, y)) \\ q_i(x, y) &= h_i(y) + r_i(x) \\ \tilde{q}_i(x, y) &= \tilde{h}_i(y) + \tilde{r}_i(x), \end{aligned}$$

where  $h_i(y) = \xi(Y_i, y)$ ,  $r_i(x) = Ld(X_i, x)$ , and  $\tilde{h}_i, \tilde{r}_i$  defined analogously.

Observe that if  $\tilde{r}_i(x) > 2$  then  $r_i(x) > 2/(1 + \eta) \geq 2(1 - \eta)$ . In this case, since  $h$  has range in  $[-1, 1]$ , the eventual application of truncation operator  $T_{[-1,1]}$  will force  $\tilde{h}(x, y) - h(x, y) \leq 2\eta$ . Hence, we may assume that

<sup>5</sup>setting  $\gamma = 1$  in [Guermeur \(2010, Theorem 1\)](#) and doing the stratification on  $L$  instead

$\tilde{r}_i(x) \leq 2$  and so  $r_i(x) \leq 2$ . It is straightforward to verify that for  $a, b \in \mathbb{R}^n$  with  $\max_{i \in [n]} |a_i - b_i| \leq \eta$ , we have

$$\left| T_{[-1,1]}(\min_i a_i) - T_{[-1,1]}(\min_i b_i) \right| \leq \eta.$$

Thus, establishing  $|q_i(x, y) - \tilde{q}_i(x, y)| \leq 2\eta$  for all  $i \in [S_1]$  and  $y \in \mathcal{Y}$  with  $\tilde{r}_i(x), r_i(x) \leq 2$  suffices to prove the claim. Indeed, by (15) we have

$$|r_i(x) - \tilde{r}_i(x)| \leq |r_i(x) - (1 + \eta)r_i(x)| \leq 2\eta.$$

*Proof of Lemma 6.* Suppose  $\tilde{h} \in \mathcal{H}_{L,\eta}$ . By the definition of  $\mathcal{H}_{L,\eta}$ , there exists an  $h \in \mathcal{H}_L$  such that  $\|\tilde{h} - h\|_\infty \leq \eta$ . Let  $h'$  be some element in a minimal  $\varepsilon$ -cover of  $\mathcal{H}_L$  so that  $\|h - h'\|_\infty \leq \varepsilon$ . Then

$$\|\tilde{h} - h'\|_\infty \leq \|\tilde{h} - h\|_\infty + \|h - h'\|_\infty \leq \varepsilon + \eta.$$

Hence,

$$\mathcal{N}(\varepsilon + \eta, \mathcal{H}_{L,\eta}, \|\cdot\|_\infty) \leq \mathcal{N}(\varepsilon, \mathcal{H}_L, \|\cdot\|_\infty),$$

whence the claim follows.  $\square$

### E. Dimensionality reduction proof

*Proof of Theorem 7.* Put  $\tilde{S} = (\tilde{X}, Y)$ . For  $X_i \in X$  and  $\tilde{X}_i \in \tilde{X}$ , define  $\delta_i(h) = h(X_i, Y_i) - h(\tilde{X}_i, Y_i)$ . Then

$$\begin{aligned} \hat{\mathcal{R}}_n(\mathcal{H}_L; S) &= \mathbb{E} \left[ \sup_{h \in \mathcal{H}_L} \frac{1}{n} \sum_{i=1}^n \sigma_i h(X_i, Y_i) \middle| S \right] \\ &= \mathbb{E} \left[ \sup_{h \in \mathcal{H}_L} \frac{1}{n} \sum_{i=1}^n \sigma_i (h(\tilde{X}_i, Y_i) - \delta_i(h)) \middle| S \right] \\ &\leq \hat{\mathcal{R}}_n(\mathcal{H}_L; \tilde{S}) + \mathbb{E} \left[ \sup_{h \in \mathcal{H}_L} \frac{1}{n} \sum_{i=1}^n \sigma_i \delta_i(h) \middle| S \right]. \end{aligned}$$

By (10), we have

$$\mathcal{R}_n(\mathcal{H}_L; \tilde{S}) \leq c_D L \left( \frac{\log 5k}{n} \right)^{1/(\beta+1)}. \quad (20)$$

Since by construction  $h$  is  $L$ -Lipschitz in its first argument, we have

$$\left| \sum_{i=1}^n \sigma_i \delta_i(h) \right| \leq \sum_{i=1}^n |\delta_i(h)| \leq L \sum_{i=1}^n d(X_i, \tilde{X}_i) \leq L\alpha. \quad (21)$$

Our claimed bound follows from (20) and (21).  $\square$
